# Supplementary material for: Women's attitudes towards intimate partner violence in Guyana: a population-based study
Source: PubMed Central journal article supplement — Lancet Reg Health Am. 2024 Oct 23;39:100920. doi: 10.1016/j.lana.2024.100920 (PMC11539650; doi:10.1016/j.lana.2024.100920), 2024-10-23
Supplement: mmc1.pdf [file mmc1.pdf]

Women's attitudes towards intimate partner violence in Guyana: A population-based study

**Supplementary materials**

Supplementary Table 1: Prevalence of women's attitudes justifying IPV against women in Guyana (Year=2009)

| Level                    | Description<br>N(%) | If she goes out<br>without<br>telling him<br>N (%) | p-value | If she neglects<br>the children<br>N (%) | p-value | If she argues<br>with him<br>N (%) | p-value | If she refuses<br>sex with him<br>N (%) | p-value | If she<br>burns<br>the food<br>N (%) | p-value | For any of<br>these<br>five<br>reasons<br>N (%) | p-value |
|--------------------------|---------------------|----------------------------------------------------|---------|------------------------------------------|---------|------------------------------------|---------|-----------------------------------------|---------|--------------------------------------|---------|-------------------------------------------------|---------|
| <b>Area of residence</b> |                     |                                                    | <0.001  |                                          | <0.001  |                                    | <0.001  |                                         | <0.001  |                                      | <0.001  |                                                 | <0.001  |
| Urban                    | 1475 (29.5)         | 25 (1.7)                                           |         | 89 (6.0)                                 |         | 34 (2.3)                           |         | 18 (1.2)                                |         | 19 (1.3)                             |         | 124 (8.4)                                       |         |
| Rural                    | 3521 (70.5)         | 261 (7.4)                                          |         | 493 (14.0)                               |         | 299 (8.5)                          |         | 208 (5.9)                               |         | 155 (4.4)                            |         | 690 (19.6)                                      |         |
| <b>Location</b>          |                     |                                                    | <0.001  |                                          | 0.001   |                                    |         |                                         | <0.001  |                                      | <0.001  |                                                 | <0.001  |
| Coastal                  | 4495 (90.0)         | 243 (5.4)                                          |         | 517 (11.5)                               |         | 274 (6.1)                          |         | 180 (4.0)                               |         | 144 (3.2)                            |         | 710 (15.8)                                      |         |
| Interior                 | 501 (10.0)          | 44 (8.7)                                           |         | 68 (13.6)                                |         | 57 (11.3)                          |         | 38 (7.6)                                |         | 31 (6.1)                             |         | 104 (20.7)                                      |         |
| <b>Region</b>            |                     |                                                    | <0.001  |                                          | <0.001  |                                    | <0.001  |                                         | <0.001  |                                      | <0.001  |                                                 | <0.001  |
| Region 1                 | 162 (3.2)           | 15 (9.4)                                           |         | 26 (16.3)                                |         | 19 (11.5)                          |         | 11 (7.0)                                |         | 14 (8.6)                             |         | 36 (22.3)                                       |         |
| Region 2                 | 293 (5.9)           | 21 (7.1)                                           |         | 38 (12.8)                                |         | 23 (7.7)                           |         | 17 (5.9)                                |         | 10 (3.3)                             |         | 56 (19.1)                                       |         |
| Region 3                 | 687 (13.8)          | 54 (7.9)                                           |         | 120 (17.4)                               |         | 58 (8.5)                           |         | 33 (4.8)                                |         | 41 (5.9)                             |         | 152 (22.1)                                      |         |
| Region 4                 | 2167 (43.4)         | 46 (2.1)                                           |         | 180 (8.3)                                |         | 56 (2.6)                           |         | 33 (1.5)                                |         | 39 (1.8)                             |         | 217 (10.0)                                      |         |
| Region 5                 | 353 (7.1)           | 21 (6.0)                                           |         | 33 (9.4)                                 |         | 34 (9.5)                           |         | 18 (5.2)                                |         | 11 (3.0)                             |         | 62 (17.7)                                       |         |
| Region 6                 | 780 (15.6)          | 93 (11.9)                                          |         | 131 (16.8)                               |         | 97 (12.4)                          |         | 73 (9.4)                                |         | 44 (5.6)                             |         | 199 (25.5)                                      |         |
| Region 7                 | 104 (2.1)           | 6 (5.8)                                            |         | 12 (11.4)                                |         | 15 (14.1)                          |         | 10 (9.9)                                |         | 5 (4.9)                              |         | 20 (19.5)                                       |         |
| Region 8                 | 95 (1.9)            | 13 (13.2)                                          |         | 13 (13.4)                                |         | 11 (11.0)                          |         | 6 (6.5)                                 |         | 4 (4.6)                              |         | 21 (21.7)                                       |         |

|                              |             |            |            |            |           |           |            |        |
|------------------------------|-------------|------------|------------|------------|-----------|-----------|------------|--------|
| Region 9                     | 78 (1.6)    | 6 (8.0)    | 13 (16.6)  | 10 (13.2)  | 9 (11.3)  | 7 (8.6)   | 20 (25.0)  |        |
| Region 10                    | 277 (5.5)   | 12 (4.4)   | 18 (6.4)   | 11 (4.1)   | 6 (2.3)   | 1 (0.4)   | 33 (11.9)  |        |
| <b>Woman age</b>             |             |            | 0.007      | 0.633      | 0.368     | 0.004     | 0.865      | 0.272  |
| 15-19                        | 1016 (20.3) | 50 (4.9)   | 127 (12.5) | 60 (5.9)   | 36 (3.5)  | 38 (3.7)  | 180 (17.7) |        |
| 20-24                        | 767 (15.4)  | 40 (5.2)   | 83 (10.8)  | 50 (6.5)   | 25 (3.2)  | 21 (2.8)  | 114 (14.9) |        |
| 25-29                        | 658 (13.2)  | 52 (7.9)   | 74 (11.3)  | 50 (7.6)   | 39 (6.0)  | 25 (3.8)  | 107 (16.3) |        |
| 30-34                        | 643 (12.9)  | 34 (5.3)   | 72 (11.2)  | 38 (5.9)   | 25 (3.9)  | 24 (3.7)  | 93 (14.5)  |        |
| 35-39                        | 699 (14.0)  | 33 (4.7)   | 80 (11.4)  | 53 (7.6)   | 36 (5.2)  | 20 (2.9)  | 108 (15.5) |        |
| 40-44                        | 624 (12.5)  | 47 (7.6)   | 76 (12.2)  | 47 (7.5)   | 39 (6.2)  | 24 (3.8)  | 111 (17.8) |        |
| 45-49                        | 589 (11.8)  | 31 (5.3)   | 72 (12.2)  | 35 (5.9)   | 19 (3.2)  | 22 (3.8)  | 98 (16.6)  |        |
| <b>Sex of household head</b> |             |            | <0.001     | <0.001     | <0.001    | <0.001    | 0.001      | <0.001 |
| Male                         | 3322 (66.5) | 249 (7.5)  | 472 (14.2) | 282 (8.5)  | 186 (5.6) | 143 (4.3) | 664 (20.0) |        |
| Female                       | 1674 (33.5) | 72 (4.3)   | 142 (8.5)  | 69 (4.1)   | 47 (2.8)  | 39 (2.3)  | 204 (12.2) |        |
| <b>Marital/Union status</b>  |             |            | 0.001      | 0.001      | <0.001    | 0.001     | 0.144      | 0.003  |
| Currently married/in union   | 2920 (58.4) | 213 (7.3)  | 388 (13.3) | 245 (8.4)  | 161 (5.5) | 120 (4.1) | 537 (18.4) |        |
| Formerly married/in union    | 536 (10.7)  | 19 (3.5)   | 55 (10.3)  | 23 (4.3)   | 16 (3.0)  | 11 (2.0)  | 69 (12.9)  |        |
| Never married/in union       | 1540 (30.8) | 55 (3.6)   | 140 (9.1)  | 49 (3.2)   | 40 (2.6)  | 43 (2.8)  | 206 (13.4) |        |
| <b>Woman education</b>       |             |            | <0.001     | <0.001     | <0.001    | <0.001    | <0.001     | <0.001 |
| None                         | 68 (1.4)    | 8 (11.4)   | 7 (10.4)   | 5 (7.6)    | 3 (3.8)   | 4 (5.6)   | 10 (15.4)  |        |
| Primary                      | 952 (19.1)  | 110 (11.6) | 174 (18.3) | 108 (11.3) | 69 (7.2)  | 61 (6.4)  | 249 (26.2) |        |
| Secondary+                   | 3977 (79.6) | 199 (5.0)  | 509 (12.8) | 278 (7.0)  | 171 (4.3) | 123 (3.1) | 672 (16.9) |        |
| <b>Wealth index quintile</b> |             |            | <0.001     | <0.001     | <0.001    | <0.001    | <0.001     | <0.001 |

|                                                   |             |           |            |           |           |          |            |        |
|---------------------------------------------------|-------------|-----------|------------|-----------|-----------|----------|------------|--------|
| Poorest                                           | 779 (15.6)  | 80 (10.2) | 126 (16.2) | 89 (11.4) | 116 (8.0) | 62 (7.2) | 190 (24.4) |        |
| Second                                            | 957 (19.2)  | 94 (9.8)  | 142 (14.8) | 95 (9.9)  | 57 (5.8)  | 56 (4.7) | 203 (21.2) |        |
| Middle                                            | 1025 (20.5) | 64 (6.2)  | 133 (13.0) | 67 (6.5)  | 42 (4.2)  | 43 (2.6) | 179 (17.5) |        |
| Fourth                                            | 1084 (21.7) | 35 (3.2)  | 111 (10.2) | 49 (4.5)  | 34 (3.3)  | 36 (2.5) | 143 (13.2) |        |
| Richest                                           | 1151 (23.0) | 15 (1.3)  | 70 (6.1)   | 35 (3.0)  | 15 (1.7)  | 20 (1.7) | 98 (8.5)   |        |
| <b>Frequency of reading newspaper or magazine</b> |             |           | <0.001     | <0.001    | <0.001    | <0.001   | <0.001     | <0.001 |
| Almost every day                                  | 1647 (30.6) | 38 (2.4)  | 121 (8.5)  | 55 (3.8)  | 33 (2.3)  | 18 (1.2) | 158 (11.1) |        |
| At least once a week                              | 1853 (38.6) | 83 (4.6)  | 214 (11.8) | 115 (6.4) | 69 (3.9)  | 54 (3.0) | 297 (16.6) |        |
| Less than once a week                             | 709 (14.8)  | 46 (6.6)  | 80 (11.6)  | 40 (5.8)  | 31 (4.7)  | 30 (4.3) | 120 (18.2) |        |
| Not at all                                        | 769 (16.0)  | 88 (11.8) | 121 (16.6) | 92 (12.5) | 60 (8.4)  | 51 (6.9) | 178 (24.8) |        |
| <b>Frequency of watching television</b>           |             |           | <0.001     | 0.054     | 0.025     | <0.001   | <0.001     | 0.002  |
| Almost every day                                  | 3452 (72.0) | 160 (4.7) | 371 (11.0) | 198 (5.8) | 115 (3.4) | 91 (2.7) | 512 (15.3) |        |
| At least once a week                              | 678 (14.1)  | 34 (5.2)  | 77 (11.8)  | 48 (7.3)  | 30 (4.6)  | 19 (2.9) | 112 (17.4) |        |
| Less than once a week                             | 218 (4.6)   | 23 (11.1) | 34 (16.9)  | 19 (9.2)  | 22 (10.8) | 18 (8.7) | 46 (23.2)  |        |
| Not at all                                        | 447 (9.3)   | 37 (8.8)  | 54 (13.0)  | 37 (8.8)  | 26 (6.4)  | 25 (6.0) | 82 (20.5)  |        |

Supplementary Table 2: Prevalence of women's attitudes justifying IPV against women in Guyana (Year=2014).

| Level                    | Description<br>N(%) | If she goes<br>out without<br>telling him<br>N (%) | p-value | If she neglects<br>the children<br>N (%) | p-value | If she argues<br>with him<br>N (%) | p-value | If she refuses<br>sex with him<br>N (%) | p-value | If she burns<br>the food<br>N (%) | p-value | For any of these<br>five reasons<br>N (%) | p-value |
|--------------------------|---------------------|----------------------------------------------------|---------|------------------------------------------|---------|------------------------------------|---------|-----------------------------------------|---------|-----------------------------------|---------|-------------------------------------------|---------|
| <b>Area of residence</b> |                     |                                                    | <0.001  |                                          | <0.001  |                                    | <0.001  |                                         | <0.001  |                                   | <0.001  |                                           | <0.001  |
| Urban                    | 1387 (27.3)         | 11 (0.8)                                           |         | 34 (2.5)                                 |         | 11 (0.8)                           |         | 10 (0.7)                                |         | 10 (0.7)                          |         | 39 (2.8)                                  |         |
| Rural                    | 3689 (72.7)         | 151 (4.1)                                          |         | 351 (9.5)                                |         | 155 (4.2)                          |         | 89 (2.4)                                |         | 103 (2.8)                         |         | 476 (12.9)                                |         |
| <b>Location</b>          |                     |                                                    | <0.001  |                                          | <0.001  |                                    | <0.001  |                                         | <0.001  |                                   | 0.049   |                                           | 0.001   |
| Coastal                  | 4442 (87.5)         | 115 (2.6)                                          |         | 315 (7.1)                                |         | 120 (2.7)                          |         | 76 (1.7)                                |         | 84 (1.9)                          |         | 418 (9.4)                                 |         |
| Interior                 | 634 (12.5)          | 46 (7.2)                                           |         | 70 (11.0)                                |         | 44 (7.0)                           |         | 25 (4.0)                                |         | 25 (3.9)                          |         | 99 (15.6)                                 |         |
| <b>Region</b>            |                     |                                                    | <0.001  |                                          | <0.001  |                                    | <0.001  |                                         | <0.001  |                                   | <0.001  |                                           | <0.001  |
| Region 1                 | 75 (1.5)            | 5 (6.0)                                            |         | 7 (9.3)                                  |         | 6 (8.2)                            |         | 2 (2.7)                                 |         | 3 (4.6)                           |         | 11 (14.8)                                 |         |
| Region 2                 | 253 (5.0)           | 23 (8.9)                                           |         | 42 (16.5)                                |         | 20 (7.8)                           |         | 11 (4.5)                                |         | 8 (3.3)                           |         | 51 (20.1)                                 |         |
| Region 3                 | 883 (17.4)          | 28 (3.2)                                           |         | 75 (8.5)                                 |         | 32 (3.6)                           |         | 22 (2.5)                                |         | 30 (3.4)                          |         | 113 (12.8)                                |         |
| Region 4                 | 2274 (44.8)         | 40 (1.8)                                           |         | 134 (5.9)                                |         | 45 (2.0)                           |         | 11 (1.0)                                |         | 23 (1.0)                          |         | 166 (7.3)                                 |         |
| Region 5                 | 322 (6.3)           | 17 (5.3)                                           |         | 47 (14.6)                                |         | 15 (4.8)                           |         | 12 (3.3)                                |         | 16 (5.1)                          |         | 66 (20.5)                                 |         |
| Region 6                 | 767 (15.1)          | 20 (2.6)                                           |         | 34 (4.4)                                 |         | 20 (2.6)                           |         | 3 (1.6)                                 |         | 14 (1.8)                          |         | 44 (5.7)                                  |         |
| Region 7                 | 81 (1.6)            | 3 (3.9)                                            |         | 6 (7.4)                                  |         | 3 (3.4)                            |         | 9 (3.7)                                 |         | 2 (1.4)                           |         | 9 (11.1)                                  |         |
| Region 8                 | 47 (0.9)            | 4 (8.3)                                            |         | 8 (17.1)                                 |         | 6 (13.6)                           |         | 3 (6.5)                                 |         | 2 (3.7)                           |         | 12 (26.3)                                 |         |
| Region 9                 | 123 (2.4)           | 19 (15.7)                                          |         | 20 (16.6)                                |         | 20 (16.6)                          |         | 13 (10.7)                               |         | 13 (10.5)                         |         | 34 (27.4)                                 |         |
| Region 10                | 251 (4.9)           | 2 (0.8)                                            |         | 10 (4.0)                                 |         | 1 (0.4)                            |         | 1 (0.4)                                 |         | 1 (0.4)                           |         | 11 (4.2)                                  |         |
| <b>Woman age</b>         |                     |                                                    | 0.048   |                                          | 0.351   |                                    | 0.003   |                                         | 0.036   |                                   | 0.002   |                                           | 0.076   |
| 15-19                    | 1025                | 34 (3.3)                                           |         | 75 (7.3)                                 |         | 33 (3.2)                           |         | 15 (1.5)                                |         | 35 (3.4)                          |         | 104 (10.1)                                |         |
| 20-24                    | 843                 | 19 (2.2)                                           |         | 62 (7.3)                                 |         | 26 (3.1)                           |         | 17 (2.0)                                |         | 17 (2.0)                          |         | 84 (10.0)                                 |         |
| 25-29                    | 718                 | 19 (2.6)                                           |         | 52 (7.2)                                 |         | 14 (2.0)                           |         | 9 (1.3)                                 |         | 7 (1.0)                           |         | 63 (8.8)                                  |         |
| 30-34                    | 594                 | 20 (3.3)                                           |         | 48 (8.0)                                 |         | 17 (2.8)                           |         | 10 (1.7)                                |         | 6 (1.0)                           |         | 59 (10.0)                                 |         |
| 35-39                    | 648                 | 22 (3.4)                                           |         | 38 (5.9)                                 |         | 21 (3.3)                           |         | 12 (1.8)                                |         | 14 (2.1)                          |         | 60 (9.2)                                  |         |
| 40-44                    | 673                 | 22 (3.2)                                           |         | 50 (7.4)                                 |         | 23 (3.4)                           |         | 17 (2.6)                                |         | 17 (2.6)                          |         | 63 (9.4)                                  |         |
| 45-49                    | 575                 | 28 (4.9)                                           |         | 60 (10.5)                                |         | 35 (5.7)                           |         | 18 (3.2)                                |         | 15 (2.6)                          |         | 78 (13.6)                                 |         |

|                                                   |             |           |            |           |          |          |            |        |
|---------------------------------------------------|-------------|-----------|------------|-----------|----------|----------|------------|--------|
| <b>Sex of household head</b>                      |             |           | 0.003      | 0.102     | <0.001   | 0.052    | 0.118      | 0.006  |
| Male                                              | 3330 (65.6) | 127 (3.8) | 270 (8.1)  | 137 (4.1) | 77 (2.3) | 80 (2.4) | 376 (11.3) |        |
| Female                                            | 1747 (34.4) | 40 (2.3)  | 121 (6.9)  | 31 (1.8)  | 26 (1.5) | 31 (1.8) | 154 (8.8)  |        |
| <b>Marital/Union status</b>                       |             |           | 0.001      | 0.036     | 0.061    | 0.535    | 0.436      | 0.001  |
| Currently married/in union                        | 3450 (70)   | 128 (3.7) | 293 (8.5)  | 128 (3.7) | 76 (2.2) | 69 (2.0) | 383 (11.1) |        |
| Formerly married/in union                         | 498 (9.8)   | 13 (2.7)  | 39 (7.8)   | 11 (2.3)  | 6 (1.2)  | 11 (2.3) | 49 (9.9)   |        |
| Never married/in union                            | 1128 (22.2) | 21 (1.9)  | 50 (4.4)   | 28 (2.5)  | 19 (1.7) | 29 (2.6) | 85 (7.5)   |        |
| <b>Woman education</b>                            |             |           | <0.001     | <0.001    | <0.001   | <0.001   | <0.001     | <0.001 |
| None                                              | 57 (1.1)    | 4 (7.3)   | 11 (18.8)  | 5 (8.7)   | 3 (5.2)  | 2 (4.1)  | 13 (22.4)  |        |
| Primary                                           | 683 (13.5)  | 42 (6.2)  | 79 (11.6)  | 48 (7.1)  | 20 (2.9) | 22 (3.2) | 108 (15.8) |        |
| Secondary+                                        | 4336 (85.4) | 139 (3.2) | 351 (8.1)  | 156 (3.6) | 95 (2.2) | 95 (2.2) | 481 (11.1) |        |
| <b>Wealth index quintile</b>                      |             |           | <0.001     | <0.001    | <0.001   | <0.001   | <0.001     | <0.001 |
| Poorest                                           | 864 (17.0)  | 75 (8.7)  | 121 (14.0) | 78 (9.0)  | 36 (4.2) | 46 (5.3) | 164 (19.0) |        |
| Second                                            | 938 (18.5)  | 29 (3.1)  | 78 (8.3)   | 26 (2.8)  | 19 (2.0) | 23 (2.4) | 114 (12.2) |        |
| Middle                                            | 1007 (19.8) | 30 (3.0)  | 86 (8.5)   | 30 (3.0)  | 20 (2.0) | 22 (2.2) | 106 (10.5) |        |
| Fourth                                            | 1132 (22.3) | 17 (1.5)  | 63 (5.6)   | 14 (1.2)  | 9 (0.8)  | 10 (0.9) | 75 (6.6)   |        |
| Richest                                           | 1135 (22.4) | 11 (1.0)  | 36 (3.2)   | 20 (1.8)  | 16 (1.4) | 10 (0.9) | 59 (5.2)   |        |
| <b>Frequency of reading newspaper or magazine</b> |             |           | <0.001     | 0.005     | <0.001   | <0.001   | <0.001     | <0.001 |
| Almost every day                                  | 1553 (32.2) | 32 (2.1)  | 85 (5.5)   | 24 (1.6)  | 16 (1.0) | 18 (1.2) | 102 (6.7)  |        |
| At least once a week                              | 1956 (40.5) | 36 (2.0)  | 145 (7.5)  | 40 (2.1)  | 31 (1.6) | 44 (2.3) | 185 (9.7)  |        |
| Less than once a week                             | 672 (14.0)  | 32 (4.8)  | 62 (9.4)   | 36 (5.4)  | 21 (3.1) | 11 (1.7) | 85 (12.9)  |        |
| Not at all                                        | 650 (13.5)  | 41 (6.4)  | 53 (8.3)   | 32 (5.0)  | 20 (3.2) | 25 (3.9) | 92 (14.7)  |        |
| <b>Frequency of watching television</b>           |             |           | 0.004      | <0.001    | 0.001    | 0.062    | 0.004      | 0.003  |

|                       |             |           |           |           |          |          |           |
|-----------------------|-------------|-----------|-----------|-----------|----------|----------|-----------|
| Almost every day      | 3704 (74.4) | 100 (2.7) | 259 (7.1) | 98 (2.67) | 61 (1.7) | 66 (1.8) | 348 (9.6) |
| At least once a week  | 677 (13.6)  | 18 (2.7)  | 49 (7.3)  | 20 (3.0)  | 17 (2.6) | 12 (1.8) | 63 (9.6)  |
| Less than once a week | 173 (3.5)   | 10 (5.8)  | 12 (7.0)  | 10 (5.9)  | 3 (1.7)  | 7 (4.1)  | 20 (11.9) |
| Not at all            | 422 (8.5)   | 22 (5.3)  | 47 (11.3) | 24 (5.8)  | 14 (3.4) | 17 (4.1) | 63 (15.3) |

---

Supplementary Table 3: Prevalence of women’s attitudes justifying IPV against women in Guyana (2009-2019) (Year=2019).

| Level                    | Description<br>N(%) | If she goes<br>out without<br>telling him<br>N (%) | p-value | If she neglects<br>the children<br>N (%) | p-value | If she argues<br>with him<br>N (%) | p-value | If she refuses<br>sex with him<br>N (%) | p-value | If she<br>burns the<br>food<br>N (%) | p-value | For any of<br>these<br>five reasons<br>N (%) | p-value |
|--------------------------|---------------------|----------------------------------------------------|---------|------------------------------------------|---------|------------------------------------|---------|-----------------------------------------|---------|--------------------------------------|---------|----------------------------------------------|---------|
| <b>Area of residence</b> |                     |                                                    | <0.001  |                                          | <0.001  |                                    | <0.001  |                                         | 0.005   |                                      | 0.008   |                                              | <0.001  |
| Urban                    | 1424 (24.2)         | 17 (1.2)                                           |         | 41 (2.9)                                 |         | 31 (2.2)                           |         | 30 (2.1)                                |         | 21 (1.5)                             |         | 93 (6.6)                                     |         |
| Rural                    | 4463 (75.8)         | 143 (3.2)                                          |         | 312 (7.0)                                |         | 196 (4.4)                          |         | 165 (3.7)                               |         | 138 (3.1)                            |         | 540 (12.1)                                   |         |
| <b>Location</b>          |                     |                                                    | <0.001  |                                          | <0.001  |                                    | <0.001  |                                         | <0.001  |                                      | <0.001  |                                              | <0.001  |
| Coastal                  | 5480 (93.1)         | 121 (2.2)                                          |         | 301 (5.5)                                |         | 186 (3.4)                          |         | 153 (2.8)                               |         | 131 (2.4)                            |         | 553 (10.1)                                   |         |
| Interior                 | 407 (6.9)           | 34 (8.3)                                           |         | 56 (13.6)                                |         | 41 (10.1)                          |         | 38 (9.4)                                |         | 31 (7.6)                             |         | 81 (19.9)                                    |         |
| <b>Region</b>            |                     |                                                    | <0.001  |                                          | <0.001  |                                    | <0.001  |                                         | <0.001  |                                      | <0.001  |                                              | <0.001  |
| Region 1                 | 130 (2.2)           | 14 (11.0)                                          |         | 21 (15.6)                                |         | 18 (13.3)                          |         | 17 (13.0)                               |         | 16 (12.0)                            |         | 32 (24.3)                                    |         |
| Region 2                 | 333 (5.7)           | 19 (5.8)                                           |         | 33 (9.7)                                 |         | 29 (8.6)                           |         | 14 (4.1)                                |         | 15 (4.4)                             |         | 27 (15.3)                                    |         |
| Region 3                 | 1110 (18.9)         | 39 (3.5)                                           |         | 103 (9.3)                                |         | 47 (4.2)                           |         | 39 (3.5)                                |         | 27 (2.4)                             |         | 168 (15.1)                                   |         |
| Region 4                 | 2565 (43.6)         | 18 (0.7)                                           |         | 72 (2.8)                                 |         | 26 (1.0)                           |         | 49 (1.9)                                |         | 38 (1.5)                             |         | 159 (6.2)                                    |         |
| Region 5                 | 372 (6.3)           | 15 (3.9)                                           |         | 13 (6.1)                                 |         | 14 (3.7)                           |         | 11 (3.0)                                |         | 14 (3.8)                             |         | 40 (10.7)                                    |         |
| Region 6                 | 797 (13.5)          | 29 (3.6)                                           |         | 58 (7.3)                                 |         | 61 (7.6)                           |         | 40 (5.0)                                |         | 29 (3.6)                             |         | 118 (14.8)                                   |         |
| Region 7                 | 89 (1.5)            | 7 (7.8)                                            |         | 13 (14.9)                                |         | 8 (9.1)                            |         | 6 (6.8)                                 |         | 5 (5.2)                              |         | 17 (18.8)                                    |         |
| Region 8                 | 33 (0.6)            | 2 (7.1)                                            |         | 4 (11.1)                                 |         | 4 (11.7)                           |         | 2 (5.7)                                 |         | 2 (5.9)                              |         | 6 (18.2)                                     |         |
| Region 9                 | 156 (2.6)           | 11 (6.7)                                           |         | 18 (11.8)                                |         | 12 (7.8)                           |         | 13 (8.6)                                |         | 9 (5.6)                              |         | 27 (17.4)                                    |         |
| Region 10                | 302 (5.1)           | 4 (1.2)                                            |         | 11 (3.5)                                 |         | 8 (2.8)                            |         | 5 (1.6)                                 |         | 6 (1.9)                              |         | 20 (6.5)                                     |         |
| <b>Woman age</b>         |                     |                                                    | 0.492   |                                          | 0.145   |                                    | 0.034   |                                         | <0.001  |                                      | 0.001   |                                              | 0.003   |
| 15-19                    | 997 (16.9)          | 30 (3.0)                                           |         | 72 (7.2)                                 |         | 37 (3.7)                           |         | 35 (3.5)                                |         | 34 (3.4)                             |         | 119 (11.9)                                   |         |
| 20-24                    | 1079 (18.3)         | 27 (2.5)                                           |         | 59 (5.5)                                 |         | 31 (2.9)                           |         | 19 (1.8)                                |         | 14 (1.3)                             |         | 100 (9.3)                                    |         |
| 25-29                    | 981 (16.7)          | 25 (2.5)                                           |         | 51 (5.2)                                 |         | 40 (4.1)                           |         | 35 (3.6)                                |         | 24 (2.4)                             |         | 102 (10.4)                                   |         |
| 30-34                    | 723 (12.3)          | 17 (2.4)                                           |         | 35 (4.9)                                 |         | 22 (3.1)                           |         | 15 (2.1)                                |         | 17 (2.4)                             |         | 69 (9.5)                                     |         |
| 35-39                    | 647 (10.9)          | 16 (2.4)                                           |         | 47 (7.2)                                 |         | 29 (4.5)                           |         | 23 (3.6)                                |         | 18 (2.7)                             |         | 84 (12.9)                                    |         |
| 40-44                    | 759 (12.9)          | 26 (3.4)                                           |         | 48 (6.3)                                 |         | 27 (3.5)                           |         | 25 (3.3)                                |         | 20 (2.6)                             |         | 68 (9.0)                                     |         |

|                                                   |             |           |           |           |           |           |            |        |
|---------------------------------------------------|-------------|-----------|-----------|-----------|-----------|-----------|------------|--------|
| 45-49                                             | 700 (11.9)  | 18 (2.6)  | 44 (6.3)  | 40 (5.7)  | 41 (5.9)  | 34 (4.8)  | 102 (14.5) |        |
| <b>Sex of household head</b>                      |             |           | 0.09      | 0.891     | 0.455     | 0.061     | 0.07       | 0.188  |
| Male                                              | 3797 (64.5) | 110 (2.9) | 239 (6.3) | 129 (3.4) | 137 (3.6) | 103 (2.7) | 433 (11.4) |        |
| Female                                            | 1855 (31.5) | 35 (1.9)  | 106 (5.7) | 65 (3.5)  | 48 (2.6)  | 33 (1.8)  | 178 (9.6)  |        |
| <b>Marital/Union status</b>                       |             |           | 0.012     | 0.996     | 0.051     | 0.842     | 0.007      | 0.025  |
| Currently married/in union                        | 3984 (67.7) | 116 (2.9) | 243 (6.1) | 167 (4.2) | 139 (3.5) | 124 (3.1) | 458 (11.5) |        |
| Formerly married/in union                         | 594 (10.1)  | 5 (0.8)   | 36 (6.1)  | 18 (3.1)  | 13 (2.1)  | 6 (1.0)   | 50 (8.4)   |        |
| Never married/in union                            | 1296 (22.2) | 34 (2.6)  | 75 (5.8)  | 39 (3.0)  | 43 (3.3)  | 32 (2.5)  | 126 (9.7)  |        |
| <b>Woman education</b>                            |             |           | <0.001    | <0.001    | <0.001    | <0.001    | <0.001     | <0.001 |
| None                                              | 75 (1.3)    | 5 (6.2)   | 3 (3.9)   | 7 (8.4)   | 4 (5.3)   | 3 (3.0)   | 15 (19.2)  |        |
| Primary                                           | 535 (9.1)   | 35 (6.5)  | 66 (12.4) | 46 (8.6)  | 46 (8.6)  | 50 (9.3)  | 125 (23.3) |        |
| Secondary+                                        | 5265 (89.6) | 116 (2.2) | 290 (5.5) | 174 (3.3) | 148 (2.8) | 111 (2.1) | 511 (9.7)  |        |
| <b>Wealth index quintile</b>                      |             |           | <0.001    | <0.001    | <0.001    | <0.001    | <0.001     | <0.001 |
| Poorest                                           | 993 (16.9)  | 56 (5.6)  | 96 (9.7)  | 80 (8.1)  | 71 (7.1)  | 52 (5.2)  | 171 (17.2) |        |
| Second                                            | 1122 (19.1) | 41 (3.6)  | 91 (8.1)  | 52 (4.6)  | 38 (3.4)  | 43 (3.8)  | 153 (13.6) |        |
| Middle                                            | 1240 (21.1) | 31 (2.5)  | 81 (6.5)  | 45 (3.6)  | 32 (2.6)  | 23 (1.9)  | 143 (11.5) |        |
| Fourth                                            | 1318 (22.4) | 16 (1.2)  | 45 (3.4)  | 28 (2.1)  | 27 (2.0)  | 25 (1.9)  | 91 (6.9)   |        |
| Richest                                           | 1213 (20.6) | 15 (1.2)  | 42 (3.4)  | 21 (1.7)  | 27 (2.2)  | 17 (1.4)  | 79 (6.5)   |        |
| <b>Frequency of reading newspaper or magazine</b> |             |           | 0.174     | 0.498     | <0.001    | 0.009     | 0.018      | 0.001  |
| Almost every day                                  | 825 (14.6)  | 19 (2.3)  | 42 (5.1)  | 15 (1.8)  | 11 (1.4)  | 10 (1.2)  | 61 (7.6)   |        |
| At least once a week                              | 1449 (25.7) | 28 (2.0)  | 82 (5.7)  | 38 (2.7)  | 28 (2.0)  | 37 (3.6)  | 137 (9.7)  |        |
| Less than once a week                             | 1098 (19.4) | 25 (2.3)  | 59 (5.5)  | 43 (4.0)  | 43 (4.0)  | 38 (3.5)  | 115 (10.7) |        |
| Not at all                                        | 2276 (40.3) | 69 (3.1)  | 143 (6.4) | 104 (4.6) | 90 (4.0)  | 67 (3.0)  | 292 (13.1) |        |
| <b>Frequency of watching television</b>           |             |           | 0.179     | 0.026     | 0.001     | <0.001    | <0.001     | <0.001 |
| Almost every day                                  | 3110 (55.1) | 69 (2.2)  | 158 (5.2) | 94 (3.1)  | 66 (2.2)  | 76 (2.5)  | 291 (9.6)  |        |
| At least once a week                              | 990 (17.5)  | 22 (2.2)  | 63 (6.4)  | 35 (3.6)  | 35 (3.6)  | 26 (2.6)  | 112 (11.6) |        |
| Less than once a week                             | 515 (9.1)   | 16 (3.1)  | 28 (5.5)  | 14 (2.7)  | 20 (4.0)  | 9 (1.8)   | 50 (9.9)   |        |

---

|            |             |          |          |          |          |          |            |
|------------|-------------|----------|----------|----------|----------|----------|------------|
| Not at all | 1029 (18.2) | 34 (3.4) | 77 (7.6) | 57 (5.6) | 51 (5.0) | 41 (4.0) | 152 (15.1) |
|------------|-------------|----------|----------|----------|----------|----------|------------|
